# Supplementary material for: Comprehensive Analysis of Hexokinase 2 Immune Infiltrates and m6A Related Genes in Human Esophageal Carcinoma
Source: Front Cell Dev Biol. 2021 Oct 7;9:715883. doi: 10.3389/fcell.2021.715883 (PMC8544599; doi:10.3389/fcell.2021.715883)
Supplement: Supplementary file 2 [file Table_2.XLSX]

## Sheet: Sheet1
Supplementary Table 2. The GO and KEGG enrichment analysis of HK2 co-expression genes
ONTOLOGY	ID	Description	GeneRatio	BgRatio	pvalue	p.adjust	qvalue	geneID	Count
BP	GO:0001667	ameboidal-type cell migration	10/84	461/18670	4.1215e-05	0.0391672	0.0354263	ANXA6/HBEGF/PPARD/VEGFA/TNFSF12/SEMA4B/GIPC1/KANK2/SMOC2/ATOH8	10
BP	GO:0044262	cellular carbohydrate metabolic process	8/84	286/18670	4.37678e-05	0.0391672	0.0354263	ACACB/HK2/NEU2/PPP1R1A/PYGM/SLC2A1/SORBS1/B3GNT5	8
BP	GO:1904659	glucose transmembrane transport	5/84	108/18670	0.000126715	0.0391672	0.0354263	HK2/PPARD/SLC2A1/SLC2A4/SORBS1	5
BP	GO:0008645	hexose transmembrane transport	5/84	112/18670	0.000150376	0.0391672	0.0354263	HK2/PPARD/SLC2A1/SLC2A4/SORBS1	5
BP	GO:0015749	monosaccharide transmembrane transport	5/84	114/18670	0.000163404	0.0391672	0.0354263	HK2/PPARD/SLC2A1/SLC2A4/SORBS1	5
BP	GO:0034219	carbohydrate transmembrane transport	5/84	116/18670	0.000177277	0.0391672	0.0354263	HK2/PPARD/SLC2A1/SLC2A4/SORBS1	5
BP	GO:0010631	epithelial cell migration	8/84	351/18670	0.000181303	0.0391672	0.0354263	HBEGF/PPARD/VEGFA/TNFSF12/GIPC1/KANK2/SMOC2/ATOH8	8
BP	GO:0090132	epithelium migration	8/84	354/18670	0.000192111	0.0391672	0.0354263	HBEGF/PPARD/VEGFA/TNFSF12/GIPC1/KANK2/SMOC2/ATOH8	8
BP	GO:0007173	epidermal growth factor receptor signaling pathway	5/84	119/18670	0.000199753	0.0391672	0.0354263	HBEGF/TGFA/RASSF2/FAM83A/FAM83B	5
BP	GO:0090130	tissue migration	8/84	360/18670	0.000215323	0.0391672	0.0354263	HBEGF/PPARD/VEGFA/TNFSF12/GIPC1/KANK2/SMOC2/ATOH8	8
BP	GO:0016049	cell growth	9/84	484/18670	0.000322677	0.0533591	0.0482627	APBB1/HBEGF/FRZB/SFN/PPARD/VEGFA/SEMA4B/FBLN5/NLGN3	9
BP	GO:0038127	ERBB signaling pathway	5/84	142/18670	0.000452095	0.0679573	0.0614665	HBEGF/TGFA/RASSF2/FAM83A/FAM83B	5
BP	GO:0006970	response to osmotic stress	4/84	83/18670	0.000534696	0.0679573	0.0614665	SLC2A1/SLC2A4/TSC22D2/EFHD1	4
BP	GO:0008643	carbohydrate transport	5/84	148/18670	0.000546053	0.0679573	0.0614665	HK2/PPARD/SLC2A1/SLC2A4/SORBS1	5
BP	GO:0001558	regulation of cell growth	8/84	416/18670	0.0005649	0.0679573	0.0614665	APBB1/HBEGF/FRZB/SFN/PPARD/VEGFA/SEMA4B/FBLN5	8
BP	GO:1904018	positive regulation of vasculature development	6/84	230/18670	0.000597755	0.0679573	0.0614665	HK2/IL1A/VEGFA/SERPINB7/TNFSF12/SMOC2	6
BP	GO:0051781	positive regulation of cell division	4/84	87/18670	0.00063891	0.0683633	0.0618338	IL1A/TGFA/VEGFA/GIPC1	4
BP	GO:0030856	regulation of epithelial cell differentiation	5/84	156/18670	0.000693299	0.0700092	0.0633225	FRZB/SFN/VEGFA/GRHL1/ATOH8	5
BP	GO:0050673	epithelial cell proliferation	8/84	434/18670	0.000744872	0.0700092	0.0633225	SFN/PPARD/TGFA/VEGFA/TNFSF12/LIMS2/ATOH8/SDR16C5	8
BP	GO:0071470	cellular response to osmotic stress	3/84	40/18670	0.000769755	0.0700092	0.0633225	SLC2A1/SLC2A4/EFHD1	3
BP	GO:0044282	small molecule catabolic process	8/84	445/18670	0.000875912	0.0733261	0.0663226	ACACB/ALDH1B1/ALDOA/ENTPD1/HK2/PPARD/UPP1/HAAO	8
BP	GO:0042149	cellular response to glucose starvation	3/84	42/18670	0.000888638	0.0733261	0.0663226	SLC2A1/UPP1/SESN1	3
BP	GO:0043616	keratinocyte proliferation	3/84	43/18670	0.000952199	0.0733261	0.0663226	SFN/PPARD/SDR16C5	3
BP	GO:0051302	regulation of cell division	5/84	168/18670	0.000967469	0.0733261	0.0663226	SFN/IL1A/TGFA/VEGFA/GIPC1	5
BP	GO:0044264	cellular polysaccharide metabolic process	4/84	103/18670	0.00120183	0.0874452	0.0790931	PPP1R1A/PYGM/SORBS1/B3GNT5	4
CC	GO:0005911	cell-cell junction	12/85	459/19717	6.20241e-07	0.000120947	0.000109032	DSC2/GJB2/GJB3/SLC2A1/STRN/VEGFA/NDRG1/SORBS1/GJB6/RAB10/TMOD3/LIMS2	12
CC	GO:0005913	cell-cell adherens junction	6/85	117/19717	1.14562e-05	0.00111698	0.00100694	DSC2/VEGFA/NDRG1/SORBS1/RAB10/TMOD3	6
CC	GO:0005922	connexin complex	3/85	21/19717	9.72258e-05	0.00631968	0.00569709	GJB2/GJB3/GJB6	3
CC	GO:0005921	gap junction	3/85	32/19717	0.000350384	0.0170812	0.0153984	GJB2/GJB3/GJB6	3
CC	GO:0062023	collagen-containing extracellular matrix	7/85	406/19717	0.00185312	0.0604328	0.0544793	ANXA6/LAD1/CFP/CLEC3B/TNXB/FBLN5/SMOC2	7
CC	GO:0045120	pronucleus	2/85	15/19717	0.00185947	0.0604328	0.0544793	SLC2A1/TET3	2
MF	GO:0070851	growth factor receptor binding	6/86	134/17697	4.821e-05	0.0121007	0.0112152	HBEGF/IL1A/IL1RN/TGFA/VEGFA/FAM83B	6
MF	GO:0050839	cell adhesion molecule binding	10/86	499/17697	0.000150846	0.017965	0.0166503	ALDOA/SFN/LAD1/TNXB/NDRG1/FBLN5/GIPC1/RAB10/TMOD3/NLGN3	10
MF	GO:1901681	sulfur compound binding	7/86	250/17697	0.000214721	0.017965	0.0166503	ACACB/ANXA6/HBEGF/CLEC3B/TNXB/VEGFA/SMOC2	7
MF	GO:0005154	epidermal growth factor receptor binding	3/86	33/17697	0.000544071	0.0341405	0.031642	HBEGF/TGFA/FAM83B	3
MF	GO:0005539	glycosaminoglycan binding	6/86	229/17697	0.000872964	0.0409073	0.0379137	ANXA6/HBEGF/CLEC3B/TNXB/VEGFA/SMOC2	6
MF	GO:0036312	phosphatidylinositol 3-kinase regulatory subunit binding	2/86	10/17697	0.00102413	0.0409073	0.0379137	FAM83A/FAM83B	2
MF	GO:0045296	cadherin binding	7/86	331/17697	0.00114084	0.0409073	0.0379137	ALDOA/SFN/LAD1/NDRG1/GIPC1/RAB10/TMOD3	7
MF	GO:0008201	heparin binding	5/86	169/17697	0.00139762	0.0438502	0.0406412	HBEGF/CLEC3B/TNXB/VEGFA/SMOC2	5
MF	GO:0098632	cell-cell adhesion mediator activity	3/86	50/17697	0.00184166	0.0513619	0.0476032	DSC2/RAB10/TMOD3	3
MF	GO:0005243	gap junction channel activity	2/86	15/17697	0.0023522	0.0590402	0.0547196	GJB2/GJB3	2
MF	GO:0005149	interleukin-1 receptor binding	2/86	16/17697	0.00267976	0.0611473	0.0566725	IL1A/IL1RN	2
MF	GO:0098631	cell adhesion mediator activity	3/86	59/17697	0.00296019	0.0619174	0.0573862	DSC2/RAB10/TMOD3	3
MF	GO:0098641	cadherin binding involved in cell-cell adhesion	2/86	19/17697	0.00378271	0.0657274	0.0609174	RAB10/TMOD3	2
MF	GO:0004745	retinol dehydrogenase activity	2/86	20/17697	0.00418979	0.0657274	0.0609174	SDR9C7/SDR16C5	2
MF	GO:0005355	glucose transmembrane transporter activity	2/86	20/17697	0.00418979	0.0657274	0.0609174	SLC2A1/SLC2A4	2
MF	GO:0015149	hexose transmembrane transporter activity	2/86	20/17697	0.00418979	0.0657274	0.0609174	SLC2A1/SLC2A4	2
MF	GO:0022829	wide pore channel activity	2/86	21/17697	0.00461626	0.0681577	0.0631699	GJB2/GJB3	2
MF	GO:0015145	monosaccharide transmembrane transporter activity	2/86	22/17697	0.00506193	0.0705858	0.0654202	SLC2A1/SLC2A4	2
MF	GO:0051119	sugar transmembrane transporter activity	2/86	24/17697	0.00601008	0.0793963	0.073586	SLC2A1/SLC2A4	2
KEGG	hsa04910	Insulin signaling pathway	5/39	137/8076	0.000472862	0.0529605	0.0467884	ACACB/HK2/PYGM/SLC2A4/SORBS1	5
KEGG	hsa04931	Insulin resistance	4/39	108/8076	0.00173549	0.0670276	0.0592162	ACACB/PYGM/SLC2A1/SLC2A4	4
KEGG	hsa04066	HIF-1 signaling pathway	4/39	109/8076	0.00179538	0.0670276	0.0592162	ALDOA/HK2/SLC2A1/VEGFA	4
KEGG	hsa00010	Glycolysis / Gluconeogenesis	3/39	67/8076	0.00402968	0.0817246	0.0722003	ALDH1B1/ALDOA/HK2	3
KEGG	hsa04920	Adipocytokine signaling pathway	3/39	69/8076	0.0043781	0.0817246	0.0722003	ACACB/SLC2A1/SLC2A4	3
KEGG	hsa05211	Renal cell carcinoma	3/39	69/8076	0.0043781	0.0817246	0.0722003	SLC2A1/TGFA/VEGFA	3
KEGG	hsa04392	Hippo signaling pathway - multiple species	2/39	29/8076	0.00849756	0.135961	0.120116	RASSF2/RASSF4	2
KEGG	hsa00051	Fructose and mannose metabolism	2/39	33/8076	0.0109177	0.149259	0.131864	ALDOA/HK2	2
KEGG	hsa00500	Starch and sucrose metabolism	2/39	36/8076	0.0129089	0.149259	0.131864	HK2/PYGM	2
KEGG	hsa04922	Glucagon signaling pathway	3/39	107/8076	0.0146245	0.149259	0.131864	ACACB/PYGM/SLC2A1	3
KEGG	hsa00620	Pyruvate metabolism	2/39	39/8076	0.015046	0.149259	0.131864	ACACB/ALDH1B1	2
KEGG	hsa05219	Bladder cancer	2/39	41/8076	0.0165497	0.149259	0.131864	HBEGF/VEGFA	2
KEGG	hsa00380	Tryptophan metabolism	2/39	42/8076	0.0173247	0.149259	0.131864	ALDH1B1/HAAO	2
KEGG	hsa04152	AMPK signaling pathway	3/39	120/8076	0.0198239	0.153631	0.135727	ACACB/SLC2A4/RAB10	3
KEGG	hsa04930	Type II diabetes mellitus	2/39	46/8076	0.0205756	0.153631	0.135727	HK2/SLC2A4	2
KEGG	hsa00240	Pyrimidine metabolism	2/39	57/8076	0.0306933	0.214853	0.189814	ENTPD1/UPP1	2
KEGG	hsa05230	Central carbon metabolism in cancer	2/39	70/8076	0.0446654	0.282387	0.249477	HK2/SLC2A1	2
KEGG	hsa04115	p53 signaling pathway	2/39	73/8076	0.04817	0.282387	0.249477	SFN/SESN1	2
KEGG	hsa05212	Pancreatic cancer	2/39	76/8076	0.0517723	0.282387	0.249477	TGFA/VEGFA	2
KEGG	hsa04010	MAPK signaling pathway	4/39	294/8076	0.0521504	0.282387	0.249477	DUSP7/IL1A/TGFA/VEGFA	4
KEGG	hsa03320	PPAR signaling pathway	2/39	78/8076	0.0542264	0.282387	0.249477	PPARD/SORBS1	2
KEGG	hsa01521	EGFR tyrosine kinase inhibitor resistance	2/39	79/8076	0.0554688	0.282387	0.249477	TGFA/VEGFA	2
KEGG	hsa04012	ErbB signaling pathway	2/39	85/8076	0.0631315	0.307423	0.271596	HBEGF/TGFA	2
KEGG	hsa05323	Rheumatoid arthritis	2/39	93/8076	0.0738704	0.344729	0.304553	IL1A/VEGFA	2
KEGG	hsa00061	Fatty acid biosynthesis	1/39	18/8076	0.0835308	0.347262	0.306792	ACACB	1
KEGG	hsa00511	Other glycan degradation	1/39	18/8076	0.0835308	0.347262	0.306792	NEU2	1
KEGG	hsa04933	AGE-RAGE signaling pathway in diabetic complications	2/39	100/8076	0.0837149	0.347262	0.306792	IL1A/VEGFA	2
KEGG	hsa00770	Pantothenate and CoA biosynthesis	1/39	21/8076	0.096775	0.3871	0.341987	ALDH1B1	1
KEGG	hsa00340	Histidine metabolism	1/39	22/8076	0.101148	0.390641	0.345115	ALDH1B1	1
KEGG	hsa01200	Carbon metabolism	2/39	118/8076	0.11069	0.413243	0.365083	ALDOA/HK2	2
KEGG	hsa00601	Glycosphingolipid biosynthesis - lacto and neolacto series	1/39	27/8076	0.122706	0.41523	0.366839	B3GNT5	1
KEGG	hsa04142	Lysosome	2/39	128/8076	0.126552	0.41523	0.366839	ACP2/TPP1	2
KEGG	hsa00230	Purine metabolism	2/39	130/8076	0.129788	0.41523	0.366839	ENTPD1/GMPR	2
KEGG	hsa00030	Pentose phosphate pathway	1/39	30/8076	0.135399	0.41523	0.366839	ALDOA	1
KEGG	hsa00053	Ascorbate and aldarate metabolism	1/39	30/8076	0.135399	0.41523	0.366839	ALDH1B1	1
KEGG	hsa00410	beta-Alanine metabolism	1/39	30/8076	0.135399	0.41523	0.366839	ALDH1B1	1
KEGG	hsa00052	Galactose metabolism	1/39	31/8076	0.139589	0.41523	0.366839	HK2	1
KEGG	hsa04915	Estrogen signaling pathway	2/39	138/8076	0.142927	0.41523	0.366839	HBEGF/TGFA	2
KEGG	hsa05418	Fluid shear stress and atherosclerosis	2/39	139/8076	0.144589	0.41523	0.366839	IL1A/VEGFA	2
KEGG	hsa00640	Propanoate metabolism	1/39	34/8076	0.152044	0.425722	0.376108	ACACB	1
KEGG	hsa04960	Aldosterone-regulated sodium reabsorption	1/39	37/8076	0.164322	0.448879	0.396566	SFN	1
KEGG	hsa04060	Cytokine-cytokine receptor interaction	3/39	295/8076	0.169435	0.451828	0.399171	IL1A/IL1RN/TNFSF12	3
KEGG	hsa04217	Necroptosis	2/39	159/8076	0.178632	0.465274	0.411051	IL1A/PYGM	2
KEGG	hsa05332	Graft-versus-host disease	1/39	42/8076	0.184402	0.468213	0.413647	IL1A	1
KEGG	hsa04940	Type I diabetes mellitus	1/39	43/8076	0.188361	0.468213	0.413647	IL1A	1
KEGG	hsa00071	Fatty acid degradation	1/39	44/8076	0.192302	0.468213	0.413647	ALDH1B1	1
KEGG	hsa04973	Carbohydrate digestion and absorption	1/39	47/8076	0.204012	0.474267	0.418995	HK2	1
KEGG	hsa00280	Valine, leucine and isoleucine degradation	1/39	48/8076	0.207878	0.474267	0.418995	ALDH1B1	1
KEGG	hsa00520	Amino sugar and nucleotide sugar metabolism	1/39	48/8076	0.207878	0.474267	0.418995	HK2	1
KEGG	hsa00600	Sphingolipid metabolism	1/39	49/8076	0.211726	0.474267	0.418995	NEU2	1
KEGG	hsa00330	Arginine and proline metabolism	1/39	51/8076	0.219368	0.481749	0.425605	ALDH1B1	1
KEGG	hsa04151	PI3K-Akt signaling pathway	3/39	354/8076	0.243278	0.499801	0.441554	TGFA/TNXB/VEGFA	3
KEGG	hsa04370	VEGF signaling pathway	1/39	59/8076	0.249219	0.499801	0.441554	VEGFA	1
KEGG	hsa04510	Focal adhesion	2/39	201/8076	0.25324	0.499801	0.441554	TNXB/VEGFA	2
KEGG	hsa00561	Glycerolipid metabolism	1/39	61/8076	0.256506	0.499801	0.441554	ALDH1B1	1
KEGG	hsa05205	Proteoglycans in cancer	2/39	205/8076	0.260451	0.499801	0.441554	HBEGF/VEGFA	2
KEGG	hsa00310	Lysine degradation	1/39	63/8076	0.263725	0.499801	0.441554	ALDH1B1	1
KEGG	hsa05321	Inflammatory bowel disease	1/39	65/8076	0.270875	0.499801	0.441554	IL1A	1
KEGG	hsa04720	Long-term potentiation	1/39	67/8076	0.277957	0.499801	0.441554	PPP1R1A	1
KEGG	hsa05221	Acute myeloid leukemia	1/39	67/8076	0.277957	0.499801	0.441554	PPARD	1
KEGG	hsa00830	Retinol metabolism	1/39	68/8076	0.281473	0.499801	0.441554	SDR16C5	1
KEGG	hsa05120	Epithelial cell signaling in Helicobacter pylori infection	1/39	70/8076	0.288455	0.499801	0.441554	HBEGF	1
KEGG	hsa04520	Adherens junction	1/39	71/8076	0.291921	0.499801	0.441554	SORBS1	1
KEGG	hsa05223	Non-small cell lung cancer	1/39	72/8076	0.295371	0.499801	0.441554	TGFA	1
KEGG	hsa01230	Biosynthesis of amino acids	1/39	75/8076	0.305622	0.499801	0.441554	ALDOA	1
KEGG	hsa05214	Glioma	1/39	75/8076	0.305622	0.499801	0.441554	TGFA	1
KEGG	hsa05133	Pertussis	1/39	76/8076	0.309007	0.499801	0.441554	IL1A	1
KEGG	hsa04014	Ras signaling pathway	2/39	232/8076	0.309121	0.499801	0.441554	TGFA/VEGFA	2
KEGG	hsa05140	Leishmaniasis	1/39	77/8076	0.312376	0.499801	0.441554	IL1A	1
KEGG	hsa05412	Arrhythmogenic right ventricular cardiomyopathy	1/39	77/8076	0.312376	0.499801	0.441554	DSC2	1
KEGG	hsa00983	Drug metabolism - other enzymes	1/39	79/8076	0.319065	0.503314	0.444657	UPP1	1
KEGG	hsa04911	Insulin secretion	1/39	86/8076	0.341982	0.522771	0.461847	SLC2A1	1
KEGG	hsa05210	Colorectal cancer	1/39	86/8076	0.341982	0.522771	0.461847	TGFA	1
KEGG	hsa04512	ECM-receptor interaction	1/39	88/8076	0.34839	0.522771	0.461847	TNXB	1
KEGG	hsa04211	Longevity regulating pathway	1/39	89/8076	0.351571	0.522771	0.461847	SESN1	1
KEGG	hsa04976	Bile secretion	1/39	90/8076	0.354738	0.522771	0.461847	SLC2A1	1
KEGG	hsa04912	GnRH signaling pathway	1/39	93/8076	0.364146	0.527337	0.465881	HBEGF	1
KEGG	hsa04657	IL-17 signaling pathway	1/39	94/8076	0.367253	0.527337	0.465881	MAPK6	1
KEGG	hsa05215	Prostate cancer	1/39	97/8076	0.376483	0.528978	0.46733	TGFA	1
KEGG	hsa01522	Endocrine resistance	1/39	98/8076	0.379531	0.528978	0.46733	HBEGF	1
KEGG	hsa04640	Hematopoietic cell lineage	1/39	99/8076	0.382564	0.528978	0.46733	IL1A	1
KEGG	hsa04928	Parathyroid hormone synthesis, secretion and action	1/39	106/8076	0.403395	0.550979	0.486767	HBEGF	1
KEGG	hsa05206	MicroRNAs in cancer	2/39	310/8076	0.444814	0.594338	0.525073	TNXB/VEGFA	2
KEGG	hsa04919	Thyroid hormone signaling pathway	1/39	121/8076	0.445753	0.594338	0.525073	SLC2A1	1
KEGG	hsa04110	Cell cycle	1/39	124/8076	0.453866	0.598036	0.52834	SFN	1
KEGG	hsa04380	Osteoclast differentiation	1/39	128/8076	0.464504	0.601171	0.53111	IL1A	1
KEGG	hsa04926	Relaxin signaling pathway	1/39	129/8076	0.467131	0.601171	0.53111	VEGFA	1
KEGG	hsa04068	FoxO signaling pathway	1/39	131/8076	0.472349	0.601171	0.53111	SLC2A4	1
KEGG	hsa05165	Human papillomavirus infection	2/39	331/8076	0.479057	0.602859	0.532601	TNXB/VEGFA	2
KEGG	hsa05162	Measles	1/39	139/8076	0.492726	0.61317	0.54171	IL1A	1
KEGG	hsa04514	Cell adhesion molecules	1/39	149/8076	0.517121	0.625631	0.552719	NLGN3	1
KEGG	hsa04261	Adrenergic signaling in cardiomyocytes	1/39	150/8076	0.519497	0.625631	0.552719	PPP1R1A	1
KEGG	hsa04932	Non-alcoholic fatty liver disease	1/39	150/8076	0.519497	0.625631	0.552719	IL1A	1
KEGG	hsa04218	Cellular senescence	1/39	156/8076	0.533514	0.633076	0.559296	IL1A	1
KEGG	hsa05010	Alzheimer disease	2/39	369/8076	0.537805	0.633076	0.559296	APBB1/IL1A	2
KEGG	hsa04310	Wnt signaling pathway	1/39	160/8076	0.542636	0.633076	0.559296	PPARD	1
KEGG	hsa05225	Hepatocellular carcinoma	1/39	168/8076	0.560363	0.647017	0.571613	TGFA	1
KEGG	hsa05164	Influenza A	1/39	171/8076	0.566836	0.647813	0.572316	IL1A	1
KEGG	hsa05152	Tuberculosis	1/39	180/8076	0.585704	0.65828	0.581563	IL1A	1
KEGG	hsa04360	Axon guidance	1/39	181/8076	0.58775	0.65828	0.581563	SEMA4B	1
KEGG	hsa05167	Kaposi sarcoma-associated herpesvirus infection	1/39	193/8076	0.61155	0.678155	0.599122	VEGFA	1
KEGG	hsa05169	Epstein-Barr virus infection	1/39	202/8076	0.628517	0.690136	0.609707	ENTPD1	1
KEGG	hsa04015	Rap1 signaling pathway	1/39	210/8076	0.64299	0.699174	0.617691	VEGFA	1
KEGG	hsa04024	cAMP signaling pathway	1/39	216/8076	0.653483	0.702524	0.620651	VIPR2	1
KEGG	hsa05166	Human T-cell leukemia virus 1 infection	1/39	219/8076	0.658616	0.702524	0.620651	SLC2A1	1
KEGG	hsa05163	Human cytomegalovirus infection	1/39	225/8076	0.668661	0.70651	0.624172	VEGFA	1
KEGG	hsa05131	Shigellosis	1/39	246/8076	0.701602	0.734387	0.6488	HK2	1
KEGG	hsa04144	Endocytosis	1/39	252/8076	0.710412	0.736723	0.650864	RAB10	1
KEGG	hsa05020	Prion disease	1/39	273/8076	0.739296	0.759643	0.671114	IL1A	1
KEGG	hsa04080	Neuroactive ligand-receptor interaction	1/39	341/8076	0.814846	0.829661	0.732971	VIPR2	1
KEGG	hsa05022	Pathways of neurodegeneration - multiple diseases	1/39	475/8076	0.906502	0.914668	0.808072	IL1A	1
KEGG	hsa05168	Herpes simplex virus 1 infection	1/39	498/8076	0.916949	0.916949	0.810086	CFP	1
